# Supplementary material for: Controlled synthesis, asymmetrical transport behavior and luminescence properties of lanthanide doped ZnO mushroom-like 3D hierarchical structures
Source: Royal Society of Chemistry journal article supplement (doi:10.1039/c4nr04359f), 2014-01-01
Supplement: c4nr04359f1.pdf [file c4nr04359f1.pdf]

## Electronic Supplementary Information (ESI)

### Controlled Synthesis, Asymmetrical Transport Behavior and Luminescence Properties of Lanthanide Doped ZnO Mushroom-like 3D Hierarchical Structures

Dan Yue,<sup>‡, a,b</sup> Wei Lu,<sup>‡, c</sup> Lin Jin,<sup>a</sup> Chunyang Li,<sup>a</sup> Wen Luo,<sup>a</sup> Mengnan Wang,<sup>a,b</sup> Zhenling Wang\*<sup>a</sup> and Jianhua Hao\*<sup>c</sup>

<sup>a</sup> The Key Laboratory of Rare Earth Functional Materials and Applications, Zhoukou Normal University, Zhoukou 466001, P. R. China

<sup>b</sup> The College of Chemistry and Molecular Engineering, Zhengzhou University, Zhengzhou 450001, P. R. China

<sup>c</sup> Department of Applied Physics and Materials Research Center, The Hong Kong Polytechnic University, Hong Kong, P. R. China

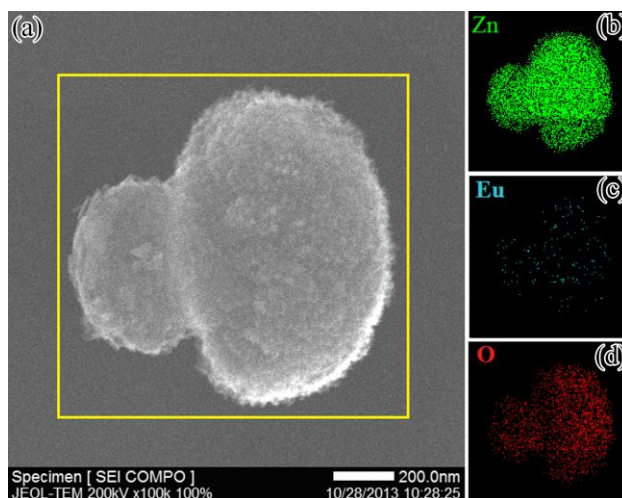

**Figure S1.** (a) STEM-SEI image of an individual ZnO: Eu<sup>3+</sup> mushroom. (b)~(d) EDS elemental mapping for Zn, Eu and O of the individual mushroom shown in (a), respectively.
